# Supplementary material for: Genomic analysis of early transmissibility assessment of the D614G mutant strain of SARS-CoV-2 in travelers returning to Taiwan from the United States of America
Source: PeerJ. 2021 Sep 2;9:e11991. doi: 10.7717/peerj.11991 (PMC8418797; doi:10.7717/peerj.11991)
Supplement: Supplemental Information 2 [file peerj-09-11991-s002.xlsx]

## Sheet: results(1)
Sequence name	Lineage	Conflict	Most common countries	Number of taxa	Date range	Days since last sampling
GA_1320/2020|EPI_ISL_420786|20200303	A	0	USA, United_Arab_Emirates, China	1740	December-30, February-11	94
SC_3569/2020|EPI_ISL_424841|20200306	A	0	USA, United_Arab_Emirates, China	1740	December-30, February-11	94
VA_6171/2020|EPI_ISL_424907|20200306	A	0	USA, United_Arab_Emirates, China	1740	December-30, February-11	94
FLMiami04_UMTL9BWN/2020|EPI_ISL_479763|20200418	A	0	USA, United_Arab_Emirates, China	1740	December-30, February-11	94
WYWYPHL001/2020|EPI_ISL_421272|20200310	A.1	0	USA, Australia, Canada	2763	February-22, August-18	271
UNUW276/2020|EPI_ISL_418061|20200313	A.1	0	USA, Australia, Canada	2763	February-22, August-18	271
NC_6999/2020|EPI_ISL_424871|20200306	A.1	0	USA, Australia, Canada	2763	February-22, August-18	271
WA13UW9/2020|EPI_ISL_413601|20200302	A.1	0	USA, Australia, Canada	2763	February-22, August-18	271
CTYale002/2020|EPI_ISL_416417|20200310	A.1	0	USA, Australia, Canada	2763	February-22, August-18	271
MIMDHHSSC20003/2020|EPI_ISL_424990|20200311	A.1	0	USA, Australia, Canada	2763	February-22, August-18	271
WAUW281/2020|EPI_ISL_418066|20200314	A.1	0	USA, Australia, Canada	2763	February-22, August-18	271
UNUW1791/2020|EPI_ISL_424249|20200320	A.1	0	USA, Australia, Canada	2763	February-22, August-18	271
AZASU2922/2020|EPI_ISL_424668|20200316	A.1	0	USA, Australia, Canada	2763	February-22, August-18	271
CACZB1104/2020|EPI_ISL_444062|20200428	A.1	0	USA, Australia, Canada	2763	February-22, August-18	271
CACZB1616/2020|EPI_ISL_468545|20200416	A.1	0	USA, Australia, Canada	2763	February-22, August-18	271
WuhanHu1	B	0	UK, USA, China	3857	December-24, January-31	105
TSGH29	B	0	UK, USA, China	3857	December-24, January-31	105
IL_1375/2020|EPI_ISL_420789|20200301	B	0	UK, USA, China	3857	December-24, January-31	105
TX_2039/2020|EPI_ISL_420796|20200229	B	0	UK, USA, China	3857	December-24, January-31	105
CA9/2020|EPI_ISL_412862|20200223	B	0	UK, USA, China	3857	December-24, January-31	105
CruiseA19/2020|EPI_ISL_414479|20200218	B	0	UK, USA, China	3857	December-24, January-31	105
CACZB05/2020|EPI_ISL_417931|20200318	B	0	UK, USA, China	3857	December-24, January-31	105
TSGH23	B.1	0	USA, UK, Spain	47630	January-24, April-13	33
TSGH08	B.1	0	USA, UK, Spain	47630	January-24, April-13	33
TSGH04	B.1	0	USA, UK, Spain	47630	January-24, April-13	33
RI_0556/2020|EPI_ISL_420795|20200301	B.1	0	USA, UK, Spain	47630	January-24, April-13	33
WIUW11/2020|EPI_ISL_417505|20200315	B.1	0	USA, UK, Spain	47630	January-24, April-13	33
VADCLS0014/2020|EPI_ISL_419708|20200312	B.1	0	USA, UK, Spain	47630	January-24, April-13	33
MA_0020/2020|EPI_ISL_424843|20200305	B.1	0	USA, UK, Spain	47630	January-24, April-13	33
WIUW04/2020|EPI_ISL_416491|20200315	B.1	0	USA, UK, Spain	47630	January-24, April-13	33
IA_6390/2020|EPI_ISL_424900|20200307	B.1	0	USA, UK, Spain	47630	January-24, April-13	33
NJ_3201/2020|EPI_ISL_424901|20200304	B.1	0	USA, UK, Spain	47630	January-24, April-13	33
NH_0029/2020|EPI_ISL_424876|20200306	B.1	0	USA, UK, Spain	47630	January-24, April-13	33
MIMDHHSSC20009/2020|EPI_ISL_424981|20200312	B.1	0	USA, UK, Spain	47630	January-24, April-13	33
NY_2929/2020|EPI_ISL_420793|20200302	B.1	0	USA, UK, Spain	47630	January-24, April-13	33
CTUW254/2020|EPI_ISL_418039|20200313	B.1	0	USA, UK, Spain	47630	January-24, April-13	33
WAUW134/2020|EPI_ISL_416672|20200310	B.1	0	USA, UK, Spain	47630	January-24, April-13	33
NYNYUMC49/2020|EPI_ISL_420300|20200318	B.1	0	USA, UK, Spain	47630	January-24, April-13	33
WIUW107/2020|EPI_ISL_425164|20200331	B.1	0	USA, UK, Spain	47630	January-24, April-13	33
AKPHL002/2020|EPI_ISL_420303|20200315	B.1	0	USA, UK, Spain	47630	January-24, April-13	33
NJPV09072/2020|EPI_ISL_421619|20200320	B.1	0	USA, UK, Spain	47630	January-24, April-13	33
IDUW2127/2020|EPI_ISL_426057|20200321	B.1	0	USA, UK, Spain	47630	January-24, April-13	33
ORUW4388/2020|EPI_ISL_426076|20200329	B.1	0	USA, UK, Spain	47630	January-24, April-13	33
INLillyIPB01704bc20/2020|EPI_ISL_421279|20200319	B.1	0	USA, UK, Spain	47630	January-24, April-13	33
UT0342/2020|EPI_ISL_420816|20200324	B.1	0	USA, UK, Spain	47630	January-24, April-13	33
VADCLS0406/2020|EPI_ISL_467800|20200422	B.1	0	USA, UK, Spain	47630	January-24, April-13	33
MIMDHHSSC20799/2020|EPI_ISL_471820|20200519	B.1	0	USA, UK, Spain	47630	January-24, April-13	33
NE10749/2020|EPI_ISL_475176|20200502	B.1	0	USA, UK, Spain	47630	January-24, April-13	33
VADCLS0251/2020|EPI_ISL_452825|20200420	B.1	0	USA, UK, Spain	47630	January-24, April-13	33
CTCDC8001/2020|EPI_ISL_454645|20200421	B.1	0	USA, UK, Spain	47630	January-24, April-13	33
NE11510/2020|EPI_ISL_466678|20200505	B.1	0	USA, UK, Spain	47630	January-24, April-13	33
CTYale134/2020|EPI_ISL_431096|20200416	B.1	0	USA, UK, Spain	47630	January-24, April-13	33
NYNYUMC420/2020|EPI_ISL_435487|20200422	B.1	0	USA, UK, Spain	47630	January-24, April-13	33
LAEVTL042/2020|EPI_ISL_451203|20200502	B.1	0	USA, UK, Spain	47630	January-24, April-13	33
NE11124/2020|EPI_ISL_475200|20200504	B.1	0	USA, UK, Spain	47630	January-24, April-13	33
VADCLS0134/2020|EPI_ISL_437773|20200415	B.1	0	USA, UK, Spain	47630	January-24, April-13	33
UT02025/2020|EPI_ISL_454731|20200417	B.1	0	USA, UK, Spain	47630	January-24, April-13	33
WAS1120/2020|EPI_ISL_463610|20200504	B.1	0	USA, UK, Spain	47630	January-24, April-13	33
NYNYUMC436/2020|EPI_ISL_435503|20200420	B.1	0	USA, UK, Spain	47630	January-24, April-13	33
LAEVTL012/2020|EPI_ISL_435550|20200425	B.1	0	USA, UK, Spain	47630	January-24, April-13	33
WIGMF02263/2020|EPI_ISL_436896|20200502	B.1	0	USA, UK, Spain	47630	January-24, April-13	33
CASR0385/2020|EPI_ISL_458264|20200428	B.1	0	USA, UK, Spain	47630	January-24, April-13	33
MIMDHHSSC20457/2020|EPI_ISL_459996|20200507	B.1	0	USA, UK, Spain	47630	January-24, April-13	33
WAS1110/2020|EPI_ISL_463600|20200504	B.1	0	USA, UK, Spain	47630	January-24, April-13	33
NE10862/2020|EPI_ISL_475191|20200504	B.1	0	USA, UK, Spain	47630	January-24, April-13	33
LAEVTL022/2020|EPI_ISL_435560|20200424	B.1	0	USA, UK, Spain	47630	January-24, April-13	33
NYNYUMC454/2020|EPI_ISL_435721|20200420	B.1	0	USA, UK, Spain	47630	January-24, April-13	33
WIUW271/2020|EPI_ISL_436565|20200426	B.1	0	USA, UK, Spain	47630	January-24, April-13	33
WIGMF01978/2020|EPI_ISL_436892|20200428	B.1	0	USA, UK, Spain	47630	January-24, April-13	33
NYNYUMC834/2020|EPI_ISL_456107|20200425	B.1	0	USA, UK, Spain	47630	January-24, April-13	33
MIMDHHSSC20455/2020|EPI_ISL_459994|20200506	B.1	0	USA, UK, Spain	47630	January-24, April-13	33
MOWUSTL033/2020|EPI_ISL_467301|20200608	B.1	0	USA, UK, Spain	47630	January-24, April-13	33
VADCLS0385/2020|EPI_ISL_467782|20200416	B.1	0	USA, UK, Spain	47630	January-24, April-13	33
UT04032/2020|EPI_ISL_475726|20200511	B.1	0	USA, UK, Spain	47630	January-24, April-13	33
OROHSU0135/2020|EPI_ISL_468109|20200504	B.1	0	USA, UK, Spain	47630	January-24, April-13	33
AZ_4811/2020|EPI_ISL_420784|20200302	B.1.1	0	UK, USA, Russia	23696	February-22, February-14	91
FL_6318/2020|EPI_ISL_420785|20200302	B.1.1	0	UK, USA, Russia	23696	February-22, February-14	91
MN5MDH5/2020|EPI_ISL_417191|20200310	B.1.1	0	UK, USA, Russia	23696	February-22, February-14	91
MN128MDH128/2020|EPI_ISL_421684|20200316	B.1.1	0	UK, USA, Russia	23696	February-22, February-14	91
OHOSUP0109/2020|EPI_ISL_421660|20200401	B.1.1	0	UK, USA, Russia	23696	February-22, February-14	91
MOWUSTL070/2020|EPI_ISL_476018|20200619	B.1.1.10	0	UK, Canada, Switzerland	512	March-01, February-02	103
NE10744/2020|EPI_ISL_466652|20200505	B.1.1.113	0	USA, Austria	62	March-15, October-26	202
NE10834/2020|EPI_ISL_475186|20200504	B.1.1.113	0	USA, Austria	62	March-15, October-26	202
OROHSU0048/2020|EPI_ISL_437528|20200419	B.1.1.26	0	USA	183	April-02, August-19	270
WAS820/2020|EPI_ISL_449990|20200415	B.1.1.26	0	USA	183	April-02, August-19	270
WAS647/2020|EPI_ISL_438200|20200419	B.1.1.26	0	USA	183	April-02, August-19	270
CTYale044/2020|EPI_ISL_419512|20200323	B.1.104	0	UK, USA, Singapore	167	March-02, July-05	315
CTYale046/2020|EPI_ISL_419514|20200324	B.1.104	0	UK, USA, Singapore	167	March-02, July-05	315
CACZB1274/2020|EPI_ISL_454611|20200416	B.1.110	0	Chile, USA, Argentina	198	March-02, August-25	264
MNMDH1055/2020|EPI_ISL_462900|20200514	B.1.116	0	USA	85	March-29, June-10	340
MNMDH1120/2020|EPI_ISL_470800|20200505	B.1.116	0	USA	85	March-29, June-10	340
MNMDH1182/2020|EPI_ISL_477272|20200521	B.1.116	0	USA	85	March-29, June-10	340
MNMDH1067/2020|EPI_ISL_470747|20200521	B.1.116	0	USA	85	March-29, June-10	340
WAS1210/2020|EPI_ISL_463700|20200507	B.1.124	0	USA	122	March-19, July-08	312
MIMDHHSSC20879/2020|EPI_ISL_471900|20200514	B.1.126	0	USA, Canada	192	May-05, February-06	99
OROHSU0058/2020|EPI_ISL_468089|20200421	B.1.134	0	USA	138	April-07, August-28	261
OROHSU0043/2020|EPI_ISL_437525|20200420	B.1.161	0	USA	47	March-27, May-16	365
WIUW307/2020|EPI_ISL_436601|20200415	B.1.162	0	USA, Canada	159	March-15, September-28	230
WIUW428/2020|EPI_ISL_480410|20200501	B.1.162	0	USA, Canada	159	March-15, September-28	230
CASR0448/2020|EPI_ISL_467972|20200418	B.1.166	0	USA, Canada	112	March-04, June-11	339
CASR0349/2020|EPI_ISL_458237|20200429	B.1.166	0	USA, Canada	112	March-04, June-11	339
UT01996/2020|EPI_ISL_454722|20200416	B.1.199	0	USA, Spain, France	150	March-16, December-14	153
CASR0341/2020|EPI_ISL_450190|20200508	B.1.243	0	USA, Mexico, Canada	4183	March-23, February-09	96
CASR0217/2020|EPI_ISL_445118|20200504	B.1.243	0	USA, Mexico, Canada	4183	March-23, February-09	96
WIGMFM00007/2020|EPI_ISL_471157|20200601	B.1.3	0	USA, Canada	218	April-23, January-17	119
WIGMF01602/2020|EPI_ISL_435400|20200423	B.1.3	0	USA, Canada	218	April-23, January-17	119
WIGMF01455/2020|EPI_ISL_435394|20200421	B.1.308	0	USA, Canada, Ecuador	26	March-22, July-14	306
IAGMF02699/2020|EPI_ISL_455568|20200508	B.1.308	0	USA, Canada, Ecuador	26	March-22, July-14	306
IAGMFM00005/2020|EPI_ISL_455582|20200526	B.1.308	0	USA, Canada, Ecuador	26	March-22, July-14	306
MIMDHHSSC20493/2020|EPI_ISL_460031|20200505	B.1.311	0	USA, Canada, Jordan	854	March-31, February-08	97
MIMDHHSSC20508/2020|EPI_ISL_460556|20200506	B.1.311	0	USA, Canada, Jordan	854	March-31, February-08	97
CTUW4344/2020|EPI_ISL_426052|20200330	B.1.319	0	USA, Australia, Canada	234	March-05, November-11	186
VADCLS0405/2020|EPI_ISL_477631|20200422	B.1.332	0	USA, Canada, Denmark	221	March-10, June-24	326
FLUF9/2020|EPI_ISL_447905|20200429	B.1.332	0	USA, Canada, Denmark	221	March-10, June-24	326
VADCLS0188/2020|EPI_ISL_437404|20200415	B.1.332	0	USA, Canada, Denmark	221	March-10, June-24	326
TSGH22	B.1.369	0	USA, New_Zealand, Canada	1555	March-12, February-06	99
WAS627/2020|EPI_ISL_438180|20200418	B.1.371	0	USA, Denmark, Ecuador	727	March-08, August-19	270
WAS1010/2020|EPI_ISL_463500|20200429	B.1.371	0	USA, Denmark, Ecuador	727	March-08, August-19	270
WAUW8437/2020|EPI_ISL_461406|20200430	B.1.371	0	USA, Denmark, Ecuador	727	March-08, August-19	270
UT02432/2020|EPI_ISL_470549|20200421	B.1.384	0	USA, Australia	314	March-15, June-24	326
UT02222/2020|EPI_ISL_436922|20200415	B.1.384	0	USA, Australia	314	March-15, June-24	326
UT02033/2020|EPI_ISL_470660|20200417	B.1.435	0	USA	75	April-10, June-18	332
VADCLS0297/2020|EPI_ISL_463100|20200430	B.1.439	0	USA, UK, Canada	114	March-13, September-09	249
WYWYPHL009/2020|EPI_ISL_421546|20200315	B.1.446	0	USA, UK	30	March-13, July-02	318
VADCLS0363/2020|EPI_ISL_463124|20200430	B.1.503	0	USA, UK	207	April-01, November-19	178
CACZB1621/2020|EPI_ISL_468550|20200501	B.1.503	0	USA, UK	207	April-01, November-19	178
SCPRG493/2020|EPI_ISL_476897|20200521	B.1.521	0	USA, Canada	128	March-21, January-04	132
UT027/2020|EPI_ISL_417970|20200316	B.1.590	0	USA	109	March-15, November-20	177
LAEVTL061/2020|EPI_ISL_451222|20200428	B.1.590	0	USA	109	March-15, November-20	177
LAEVTL06/2020|EPI_ISL_435039|20200415	B.1.595	0	USA, Canada, Singapore	1637	March-09, February-01	104
PA_1802/2020|EPI_ISL_424881|20200305	B.1.610	0	UK	175	June-11, January-19	117
NE_6605/2020|EPI_ISL_424874|20200305	B.3	0	UK, Germany, Belgium	841	February-25, August-25	264
UT010/2020|EPI_ISL_417958|20200310	B.3	0	UK, Germany, Belgium	841	February-25, August-25	264
OR_5430/2020|EPI_ISL_420794|20200301	B.40	0	UK, USA, Australia	1565	February-21, August-31	258
CACZB1066/2020|EPI_ISL_437066|20200416	B.46	0	USA	47	March-15, May-13	368
