# Supplementary material for: Genomic analysis of early transmissibility assessment of the D614G mutant strain of SARS-CoV-2 in travelers returning to Taiwan from the United States of America
Source: PeerJ. 2021 Sep 2;9:e11991. doi: 10.7717/peerj.11991 (PMC8418797; doi:10.7717/peerj.11991)
Supplement: Supplemental Information 3 [file peerj-09-11991-s003.xlsx]

## Sheet: glue application_TSGH_analysis_
CoV-GLUE enabled by data from GISAID
Case	Sequence	Classification hCoV-19?	Differences from WuhanHu1
Case 1	TSGH04	Yes	SNPs: C1059T, C3037T, T7217C, C14408T, C18568T, A23403G, G25563T
			Known amino acid replacement in nsp2: T85I
			Known amino acid replacement in nsp12: P323L
			Known amino acid replacement in nsp14: L177F
			Known amino acid replacement in S: D614G
			Known amino acid replacement in ORF 3a: Q57H
Case 2	TSGH08	Yes	SNPs: C1059T, C3037T, C6926T, C11916T, C14408T, C18998T, A23403G, G25563T, G29540A
			Known amino acid replacement in nsp2: T85I
			Known amino acid replacement in nsp3: P1403S
			Known amino acid replacement in nsp7: S25L
			Known amino acid replacement in nsp12: P323L
			Known amino acid replacement in nsp14: A320V
			Known amino acid replacement in S: D614G
			Known amino acid replacement in ORF 3a: Q57H
Case 3	TSGH22	Yes	SNPs: C1059T, C3037T, G12014T, C14408T, C16260T, T18471C, A23403G, G25563T, C28821A
			Known amino acid replacement in nsp2: T85I
			Known amino acid replacement in nsp7: V58F
			Known amino acid replacement in nsp12: P323L
			Known amino acid replacement in S: D614G
			Known amino acid replacement in ORF 3a: Q57H
			Known amino acid replacement in N: S183Y
Case 4	TSGH23	Yes	SNPs: C1059T, C3037T, C14408T, A23403G, G25563T
			Known amino acid replacement in nsp2: T85I
			Known amino acid replacement in nsp12: P323L
			Known amino acid replacement in S: D614G
			Known amino acid replacement in ORF 3a: Q57H
Case 5	TSGH29	Yes	SNPs: C3037T, T7060G, A7064G, G11453T, A11768T, A17542C, T17574G, T26545G
			Known amino acid replacement in nsp3: R1449G
			Known amino acid replacement in nsp6: A161S
			Known amino acid replacement in nsp6: I266L
			Known amino acid replacement in nsp13: M436L
			Known amino acid replacement in M: I8S
